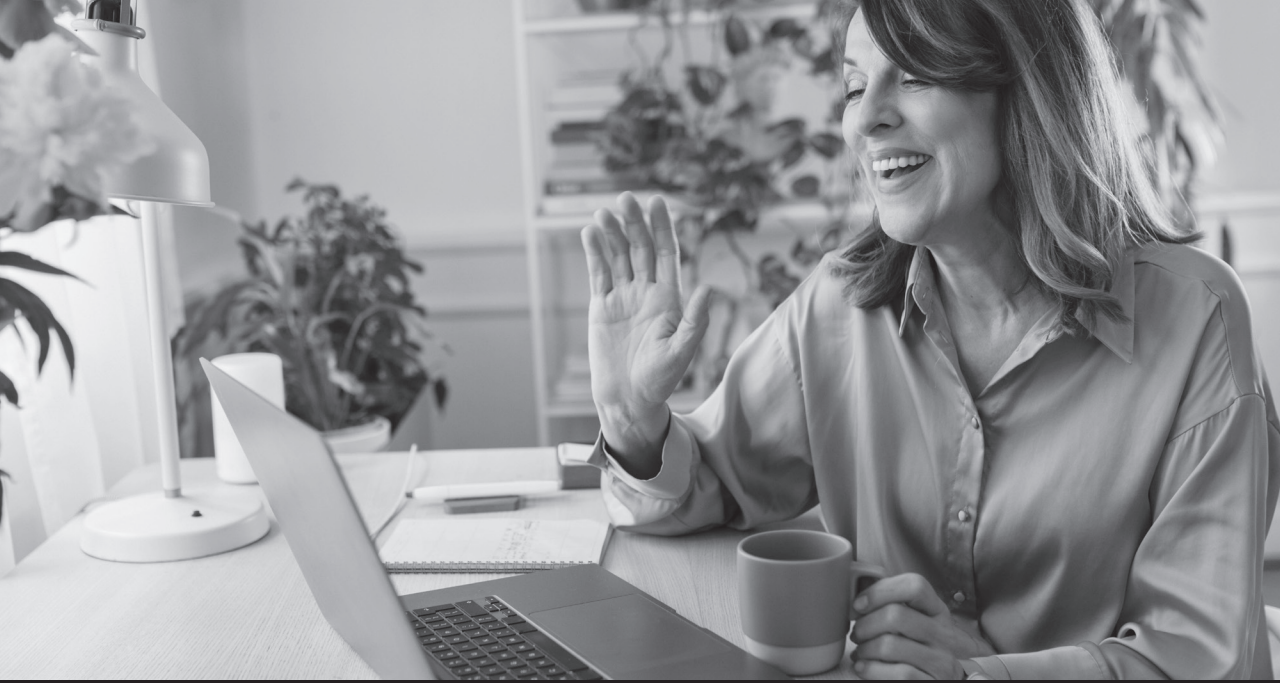

# We've Got You Covered

## American Psychiatric Association Endorsed Professional Liability Insurance Program

Designed for Psychiatrists in all practice settings

**DID YOU KNOW? We find that our policyholders are more likely to receive a board complaint than be named in a claim or lawsuit.**

Most insurance policies provided by employers do not include reimbursement for costs incurred to defend a complaint (or have limits that may be shared with others).

Not to worry... we include up to \$50,000 of defense reimbursement – with the option to increase this limit to \$150,000.

What's more, coverage for **Telepsychiatry** is provided, subject to the terms and conditions of the policy.

Cyber Coverage is available as an endorsement at renewal or on a new American Professional Agency policy. Available in most states on an admitted basis.

*(All discounts, coverage features and rating are subject to individual state approval.)*

Visit us at [apamalpractice.com](http://apamalpractice.com) or call **877-740-1777** to learn more.

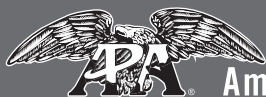

**American Professional Agency**

LEADERS IN PSYCHIATRIC MEDICAL LIABILITY INSURANCE

AMERICAN  
PSYCHIATRIC  
ASSOCIATION

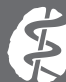

# Subscription and Business Information

*The American Journal of Psychiatry*, ISSN 0002-953X, is published monthly by the American Psychiatric Association.

The American Psychiatric Association does not hold itself responsible for statements made in its publications by contributors or advertisers. Unless so stated, material in *The American Journal of Psychiatry* does not reflect the endorsement, official attitude, or position of the American Psychiatric Association or of the Journal's Editorial Board.

Periodicals postage paid at Washington, DC, and additional mailing offices. POSTMASTER: Send address changes to *The American Journal of Psychiatry*, Circulation Department, American Psychiatric Association, 800 Maine Avenue, S.W., Suite 900, Washington, D.C. 20024.

## Editorial Office

*American Journal of Psychiatry*  
American Psychiatric Association  
800 Maine Avenue, S.W., Suite 900  
Washington, D.C. 20024  
E-mail: [ajp@psych.org](mailto:ajp@psych.org)

## Customer Service

Phone: (800) 368-5777 (toll-free)  
E-mail: [appi@psych.org](mailto:appi@psych.org)

## APA Member Subscription Services

Phone: (888) 35-PSYCH (toll-free)

## Subscriptions

Regular and resident-fellow members in the U.S. receive print and online access as a **member benefit**. Subscriptions for non-members start at \$362 per year. Online only subscriptions start at \$327 per year. Go to <http://www.appi.org/products> for more information.

Institutional subscriptions are tier priced. For institutional site license or pricing information, contact (202) 559-3729 or [institutions@psych.org](mailto:institutions@psych.org).

*Additional subscription options, including single issues and student rates*  
Contact Customer Service

## Advertising

*Pharmaceutical Print and Online Advertising*  
Frank Cox, Kathleen Harrison, Tim Wolfinger  
Pharmaceutical Media, Inc.  
30 East 33rd Street  
New York, NY 10016  
Phone: (212) 904-0379  
E-mail: [twolfinger@pminy.com](mailto:twolfinger@pminy.com)

*Nonpharmaceutical and Online Sales*  
Eamon Wood  
Pharmaceutical Media, Inc.  
E-mail: [ewood@pminy.com](mailto:ewood@pminy.com)  
(see address and phone above).

## Permissions and Reprints

Material published in the journals of the American Psychiatric Association and American Psychiatric Association Publishing is protected by copyright and all rights are reserved. Material may not be reproduced in any form or by any means without written permission from the copyright owner. For permission to reproduce material published by APA, please visit <http://www.appi.org/customer-service/permissions> for more information. Permission can also be secured through the Copyright Clearance Center ([www.copyright.com](http://www.copyright.com)).

APA does not require that permission be obtained for the photocopying of isolated articles for nonprofit classroom or library reserve use; all fees associated with such permission are waived. This consent does not extend to other kinds of copying, such as copying for general distribution, for advertising or promotional purposes, for creating new collective works, or for resale. Requests for commercial distribution and bulk reprints should be directed to (202) 609-7075.

Indexed in Abstracts for Social Workers, Academic Abstracts, Biological Abstracts, Chemical Abstracts, Chicago Psychoanalytic Literature Index, Cumulative Index to Nursing Literature, Excerpta Medica, Hospital Literature Index, Index Medicus, International Nursing Index, Nutrition Abstracts, Psychological Abstracts, Science Citation Index, Social Science Source, and Social Sciences Index.

Pages are produced by KnowledgeWorks Global (Waterbury, VT) and printed by Sheridan NH (Hanover, NH) on acid-free paper effective with Volume 169, Number 1, January 2012.

© 2021 American Psychiatric Association.

# Improving the Lives We Touch

Acadia physicians are recognized thought leaders who help set the standard for clinical excellence while providing a vital service that improves lives, unites families, and strengthens communities.

## SPECIALTIES:

Inpatient | Residential | Specialty | PHP | IOP | Outpatient

For more information, please visit: [www.practicewithacadiahealth.com](http://www.practicewithacadiahealth.com)

## The American Journal of Psychotherapy

APA's journal of psychotherapy practice and research

Since 1947, the *American Journal of Psychotherapy* has provided a forum for advancing the theory, science, and clinical practice of psychotherapy, publishing articles that expand understanding of psychotherapies, especially in the domains of efficacy, process, education, and practice. The journal provides authors and readers the opportunity to engage fully in pressing psychotherapy issues such as defining core elements of psychotherapies, dissemination of evidence-based practices, scaling best practices for expansion to larger populations, understanding mechanisms of change, and evaluating best practices for psychotherapy training and supervision. From its new home as part of APA Publishing's portfolio of journals, the *American Journal of Psychotherapy* is the ideal vehicle to disseminate knowledge about psychotherapy and send a message that psychotherapy remains firmly within the purview of psychiatry.

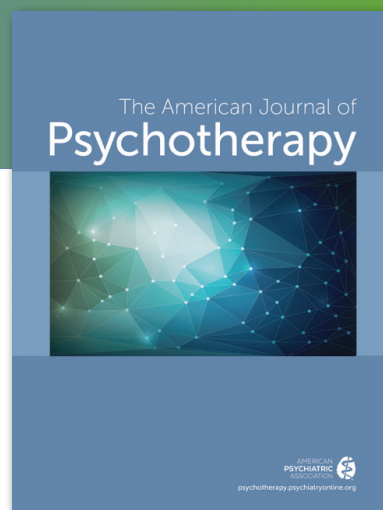

Holly A. Swartz, M.D., Editor-in-Chief

Frequency: Quarterly  
Online ISSN: 2575-6559  
[psychotherapy.psychiatryonline.org](http://psychotherapy.psychiatryonline.org)

- To receive updates on new content, follow the journal on Twitter (@APAPubJournals) and sign up for free publication alerts at [psychiatryonline.org](http://psychiatryonline.org)
- To see more from the journal, including its entire 70+-year archive or to get information about submitting a paper, visit [www.psychotherapy.psychiatryonline.org](http://www.psychotherapy.psychiatryonline.org)

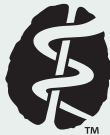

# The American Journal of Psychiatry

Official Journal of the American Psychiatric Association

## Officers 2021–2022

### President

Vivian B. Pender, M.D.

### President-Elect

Rebecca W. Brendel, M.D., J.D.

### Treasurer

Richard F. Summers, M.D.

### Secretary

Sandra M. DeJong, M.D., M.Sc.

### Assembly

#### Speaker

Mary Jo Fitz-Gerald, M.D., M.B.A.

#### Speaker-Elect

Adam Nelson, M.D.

#### Recorder

Vasilis K. Pozios, M.D.

### Office of the CEO and Medical Director

#### CEO and Medical Director

Saul Levin, M.D., M.P.A., F.R.C.P.-E.

### Board of Trustees

Elie G. Aoun, M.D., M.R.O.

Jenny L. Boyer, M.D., Ph.D., J.D.

Kenneth Certa, M.D.

Jeffrey L. Geller, M.D., M.P.H.

Glenn A. Martin, M.D.

Eric M. Plakun, M.D.

Michele Reid, M.D.

Mary Hasbah Roessel, M.D.

Bruce J. Schwartz, M.D.

Altha J. Stewart, M.D.

Felix Torres, M.D., M.B.A.

Sanya Virani, M.D., M.P.H.

Cheryl D. Wills, M.D.

Urooj Yazdani, M.D.

Melinda Young, M.D.

## Editorial Board

### Editor-in-Chief

Ned H. Kalin, M.D.

### Deputy Editors

Elisabeth Binder, M.D., Ph.D.

Kathleen T. Brady, M.D., Ph.D.

David A. Lewis, M.D.

Daniel S. Pine, M.D.

Carolyn Rodriguez, M.D., Ph.D.

Madhukar Trivedi, M.D.

### Associate Editors

Olusola Ajilore, M.D., Ph.D.

Huda Akil, Ph.D.

Melissa Arbuckle, M.D., Ph.D.

Eraka P.J. Bath, M.D.

Alan Brown, M.D., M.P.H.

Tyrone Cannon, Ph.D.

Karl Deisseroth, M.D., Ph.D.

Benjamin G. Druss, M.D., M.P.H.

Javier I. Escobar, M.D., M.Sc.

Julie L. Fudge, M.D.

Qiyong Gong, M.D., Ph.D.

Raquel E. Gur, M.D., Ph.D.

Helena Hansen, M.D., Ph.D.

David C. Henderson, M.D.

Yasmin Hurd, Ph.D.

Clinton D. Kilts, Ph.D.

Carlos López Jaramillo, M.D., M.Sc., Ph.D.

Joan L. Luby, M.D.

John C. Markowitz, M.D.

Helen S. Mayberg, M.D., F.R.C.P.C.

Terrie E. Moffitt, Ph.D.

Charles B. Nemeroff, M.D., Ph.D.

Roy Perlis, M.D.

Diego A. Pizzagalli, Ph.D.

Bryan L. Roth, M.D., Ph.D.

Alan F. Schatzberg, M.D.

Dikoma C. Shungu, Ph.D.

Anita Thapar, M.B.B.Ch., F.R.C.Psych.,

Ph.D., F.Med.Sci.

Mauricio Tohen, M.D., Dr.PH., M.B.A.

Giulio Tononi, M.D., Ph.D.

Nim Tottenham, Ph.D.

John T. Walkup, M.D.

### Editors Emeriti

Nancy C. Andreasen, M.D., Ph.D.

Robert Freedman, M.D.

### Former Editors

Amariah Brigham, M.D., 1844–1849

T. Romeyn Beck, M.D., 1849–1854

John P. Gray, M.D., 1854–1886

G. Alder Blumer, M.D., 1886–1894

Richard Dewey, M.D., 1894–1897

Henry M. Hurd, M.D., 1897–1904

Edward N. Brush, M.D., 1904–1931

Clarence B. Farrar, M.D., 1931–1965

Francis J. Braceland, M.D., 1965–1978

John C. Nemiah, M.D., 1978–1993

### Editorial Staff

#### Executive Editor

Michael D. Roy

#### Senior Editor

John J. Guardiano, Ph.D.

#### Production Manager

Susan Westrate

#### Staff Editors

Angela Moore

#### Editorial Support Services Manager

Heidi Koch-Bubel

#### Editorial Assistant

Linda LaCour

#### Editorial Assistant/ Permissions Coordinator

Efrem Tuquabo

Efrem Tuquabo

### Publisher

John McDuffie

## PERSPECTIVES

### EDITOR'S NOTE

#### 575 Impacts of Structural Racism, Socioeconomic Deprivation, and Stigmatization on Mental Health

*Ned H. Kalin, M.D.*

### EDITORIALS

#### 579 Structural Racism as a Proximal Cause for Race-Related Differences in Psychiatric Disorders

*Nathaniel G. Harnett, Ph.D., Kerry J. Ressler, M.D., Ph.D.*

#### 582 Environmental Influences on Genetic Contributions to Intelligence and Education

*W. David Hill, Ph.D.*

#### 584 Changing the Face of Schizophrenia

*Stephen R. Marder, M.D.*

#### 586 Optimizing Treatment for Opioid Use Disorder

*Kathleen T. Brady, M.D., Ph.D.*

### CLINICAL CASE CONFERENCE

#### 588 A Potential Case of Acute Ketamine Withdrawal: Clinical Implications for the Treatment of Refractory Depression

*Nichole Roxas, M.D., M.P.H., et al.*

### REVIEWS AND OVERVIEWS

#### 592 Dismantling Structural Racism in Psychiatry: A Path to Mental Health Equity

*Ruth S. Shim, M.D., M.P.H. CME*

Addressing institutional racism in psychiatry requires education and self-reflection, changing social norms to encourage inclusion and equity in personal and professional settings, and advocating for public policies that focus on the social determinants of mental health.

#### 599 From Womb to Neighborhood: A Racial Analysis of Social Determinants of Psychosis in the United States

*Deidre M. Anglin, Ph.D., et al. EDITORIAL • CME*

Reviewed evidence suggests the legacy of systemic racism in the U.S. shapes racial inequities in social determinants of psychosis at neighborhood and individual levels. A shift in funding priorities and training that better reflects this evidence is urgently needed in North American psychiatry if we are to advance intervention development and prevention efforts that are consistent with an anti-racism framework.

#### 611 Improving Suicide Prevention Through Evidence-Based Strategies: A Systematic Review

*J. John Mann, M.D., et al.*

Suicide is the tenth leading cause of death in the U.S., and the age-adjusted annual suicide rate has steadily risen 36.7% over two decades. A systematic review designed to identify promising suicide prevention strategies scalable to state and national levels suggests that the training of general practitioners might hold particular promise.

## ARTICLES

**625 Modification of Heritability for Educational Attainment and Fluid Intelligence by Socioeconomic Deprivation in the UK Biobank**

*Mathias Rask-Andersen, Ph.D., et al.* EDITORIAL

New data on the genetics of cognitive processes and its relation to socioeconomic factors suggest that genetics exerts distinct effects on cognition in communities with varying levels of socioeconomic deprivation.

**635 Sustained Effect of a Brief Video in Reducing Public Stigma Toward Individuals With Psychosis: A Randomized Controlled Trial of Young Adults**

*Doron Amsalem, M.D., et al.* EDITORIAL

A 90-second video showed a month-long sustained public stigma reduction by humanizing schizophrenia and focusing more on the person than the illness. Such an intervention may have potential to increase the likelihood of seeking care and improve access to treatment among young people with psychosis.

**643 The Risk of Overdose With Concomitant Use of Z-Drugs and Prescription Opioids: A Population-Based Cohort Study**

*Alejandro Szmulewicz, M.D., M.P.H., et al.*

An examination of more than a million records to determine the association between overdose events and concomitant treatment with prescription opioids and Z-drugs found that use of both medications was associated with increased risk of overdose.

**651 Association Between Benzodiazepine or Z-Drug Prescriptions and Drug-Related Poisonings Among Patients Receiving Buprenorphine Maintenance: A Case-Crossover Analysis**

*Kevin Y. Xu, M.D., M.P.H., et al.* CME

A review of prescription claims and nonfatal drug-related poisoning data found that patients prescribed buprenorphine have double the odds of drug-related poisoning when co-prescribed benzodiazepines. Short-acting and high-dose benzodiazepines conferred additional risk, while buprenorphine remained protective against overdose.

**660 Sublingual Buprenorphine-Naloxone Compared With Injection Naltrexone for Opioid Use Disorder: Potential Utility of Patient Characteristics in Guiding Choice of Treatment**

*Edward V. Nunes, Jr., M.D., et al.* EDITORIAL

Sublingual buprenorphine-naloxone and extended-release injection naltrexone represent two promising new treatments for opioid use disorder. A 24-week multisite randomized controlled trial found that homeless patients experienced less relapse to regular opioid use on extended-release naltrexone, while among those not homeless there was less relapse on buprenorphine-naloxone. More patients assigned to extended-release naltrexone failed to initiate medication, a difference mitigated by criminal justice supervision, patients' stated preferences for medication, and factors likely to influence the discomfort of the naltrexone induction process.

## COMMUNICATIONS AND UPDATES

**671 Correction to Krakowski et al.****672 Highlights From Residents' Journal: June 2021**

**Cover:** In an issue devoted to mental health impacts of structural racism, socioeconomic deprivation, and stigmatization, Anglin et al. (p. 599) review how the legacy of systemic racism in the United States has shaped racial inequities in social determinants of psychosis at neighborhood and individual levels. The authors call for a shift in funding priorities and training to advance intervention development and prevention efforts consistent with an anti-racism framework. Image modified from the authors' Figure 1 depicting a hypothesized model of systemic racism and psychosis in the United States.

# THE AMERICAN PSYCHIATRIC ASSOCIATION

800 Maine Avenue, S.W., Suite 900, Washington, D.C. 20024

(888) 357-7924 (toll-free inside the U.S. and Canada)

web site: [www.psychiatry.org](http://www.psychiatry.org) • e-mail: [apa@psych.org](mailto:apa@psych.org)

## Chairpersons of Councils, Committees, and Task Forces

### Standing Committees

|                             |                                 |
|-----------------------------|---------------------------------|
| <b>Bylaws</b>               | Edward R. Herman, J.D., M.D.    |
| <b>Elections</b>            | Justin W. Schoen, M.D.          |
| <b>Ethics</b>               | Charles Dike, M.D.              |
| <b>Finance and Budget</b>   | Ann T. Sullivan, M.D.           |
| <i>Audit</i>                | Ayana Jordan, M.D., Ph.D.       |
| <i>Investment Oversight</i> | Steven S. Sharfstein, M.D.      |
| <b>Joint Reference</b>      | Rebecca W. Brendel, M.D., J.D.  |
| <b>Membership</b>           | Kimberly A. Gordon-Achebe, M.D. |
| <b>Nominating</b>           | Jeffrey L. Geller, M.D., M.P.H. |
| <b>Tellers</b>              | Mariam F. Aboukar, D.O.         |

### Non-Standing Committee

|                             |                               |
|-----------------------------|-------------------------------|
| <b>Conflict of Interest</b> | Sandra M. DeJong, M.D., M.Sc. |
|-----------------------------|-------------------------------|

### Councils

#### Council on Addiction Psychiatry

Smita Das, M.D., M.P.H., Ph.D.

#### Council on Advocacy and Government Relations

Katherine G. Kennedy, M.D.

*Advocacy and Litigation Funding*

Bhasker J. Dave, M.D.

#### Council on Children, Adolescents, and Their Families

Gabrielle Shapiro, M.D.

*Women's Mental Health*

Ludmila B. De Faria, M.D.

#### Council on Communications

Isabel K. Norian, M.D.

#### Council on Consultation-Liaison Psychiatry

Sejal B. Shah, M.D.

#### Council on Geriatric Psychiatry

Maria D. Llorente, M.D.

#### Council on Healthcare Systems and Financing

Robert L. Trestman, M.D., Ph.D.

*Integrated Care*

Benjamin G. Druss, M.D.

*RBRVS, Codes and Reimbursement*

Gregory G. Harris, M.D.

*Reimbursement for Psychiatric Care*

Laurence H. Miller, M.D.

*Telepsychiatry*

James H. Shore, M.D.

#### Council on International Psychiatry and Global Health

David C. Henderson, M.D.

*Chester Pierce Human Rights Award Committee*

Michelle P. Durham, M.D., M.P.H.

#### Council on Medical Education and Lifelong Learning

Eindra Khin Khin, M.D.

*Innovation*

Nina Vasani, M.D.

*Scientific Program*

Catherine C. Crone, M.D.

*Scientific Program—Mental Health Services Conference*

*(Oct. to Oct. tenure)*

Sarah Y. Vinson, M.D.

*Vestermark Award Committee*

Donna Marie Sudak, M.D.

*Well-being and Burnout*

Constance Guille, M.D.

#### Council on Minority Mental Health and Health Disparities

Walter Wilson, Jr., M.D.

#### Council on Psychiatry and Law

Debra A. Pinals, M.D.

*Judicial Action*

Reena Kapoor, M.D.

#### Council on Quality Care

Carol L. Alter, M.D.

*Mental Health Information Technology*

John Torous, M.D.

*Quality and Performance Measurement*

David S. Kroll, M.D.

*Practice Guidelines*

Daniel J. Anzia, M.D.

#### Council on Research

Jonathan E. Alpert, M.D., Ph.D.

*Climate Change and Mental Health*

Elizabeth Haase, M.D.

*Psychiatric Dimensions of Disasters*

Joshua C. Morganstein, M.D.

# Go Online

Visit [ajp.psychiatryonline.org](http://ajp.psychiatryonline.org) for these features!

## AJP in Advance

*Discover the latest research advances before they appear in print*

### **Whole Brain White Matter Tract Deviation and Idiosyncrasy From Normative Development in Autism and ADHD and Unaffected Siblings Link With Dimensions of Psychopathology and Cognition**

Autism spectrum disorder and attention deficit hyperactivity disorder could be conceptualized as white matter tract deviations and idiosyncratic change from normative patterns. The common brain-cognitive relationships underlying these neurodevelopmental disorders constitute a continuum from subtle to strong phenotypic expressions.

### **Variable Emergence of Autism Spectrum Disorder Symptoms From Childhood to Early Adulthood**

Autism spectrum disorders are understood to be conditions that arise in early childhood. However, symptoms of these disorders can manifest in many ways, including at levels insufficiently severe to qualify for a full diagnosis. New data on changes in autism spectrum disorder symptoms in young people followed into adulthood suggest that symptoms of autism spectrum disorders can arise at other points in life besides early childhood.

## AJP CME

*Earn CME credit: 3 courses per issue*

You can earn CME credits by reading articles in *The American Journal of Psychiatry*. Three articles in this issue form a short course that consists of reading the article and answering three multiple-choice questions with a single correct answer for up to 1 *AMA PRA Category 1 Credit™* each. Credit is issued only to subscribers of the online AJP CME Course Program.

See the table below for the articles in this month's issue that are the subject of a CME quiz.

#### **In this issue**

Dismantling Structural Racism in Psychiatry: A Path to Mental Health Equity (p. 592)

From Womb to Neighborhood: A Racial Analysis of Social Determinants of Psychosis in the United States (p. 599)

Association Between Benzodiazepine or Z-Drug Prescriptions and Drug-Related Poisonings Among Patients Receiving Buprenorphine Maintenance: A Case-Crossover Analysis (p. 651)

## History of Psychiatry

*Revisit the field's rich history through the AJP Archive*

### **100 years ago this month: Some Problems Confronting the Association**

Owen Copp, M.D., physician-in-chief and superintendent of the Department of Mental Diseases of the Pennsylvania Hospital, delivers his Presidential address: "The path of mental health starts and ends in the community; its course leads through the home, the school, the hospital, out again into the widening network of supervisory and helpful agencies of the community; guide posts along the way are prevention, treatment, rehabilitation."

@APAPubJournals

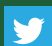

Psychiatry Online

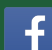

AMERICAN  
PSYCHIATRIC  
ASSOCIATION  
PUBLISHING

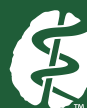

[www.appi.org](http://www.appi.org)  
1-800-368-5777  
[appi@psych.org](mailto:appi@psych.org)



# The American Journal of Psychiatry

## Residents' Journal

[ajp.psychiatryonline.org/loi/ajp-rj](http://ajp.psychiatryonline.org/loi/ajp-rj)

### June 2021 | Volume 16, Issue 4

- 2** Reflections on Psychiatric Training  
Matthew L. Edwards, M.D., Editor-in-Chief
- 3** On the History of Psychiatry  
Matthew L. Edwards, M.D., and Christopher Magoon, M.D.
- 4** How Late 19th-Century Psychiatry Influenced the Birth of the American Western Genre  
Alison Neuwirth, B.A.
- 6** Deinstitutionalization Through Optimism: The Community Mental Health Act of 1963  
Blake Erickson, M.D., M.A.
- 8** Spirits From the Past: Stigma in Historical Medical Literature on Alcohol Addiction and Implications for Modern Practice  
Pooja R. Sarkar, D.O.
- 11** Revisiting Frantz Fanon: His Life and Legacy on Race, Colonization, and Psychiatry  
Will Novey, M.D.
- 13** Idée Fixe: Rachmaninoff and Death Anxiety  
Cynthia S. Peng, M.D.
- 15** Topiramate as Possible Treatment for Catatonia in Anti-NMDA Receptor Encephalitis  
Tomas Melicher, M.D., and Kyan Younes, M.D.
- 18** RUN  
Lisa Ekeanyanwu, M.D.

**The Residents' Journal** is an e-publication that serves as a forum for sharing ideas and experiences in training, clinical practice, research, and careers.

**The Residents' Journal** considers manuscripts authored by medical students, resident physicians, and fellows. For information about submitting manuscripts, visit the **Author Resources** page online: [https://ajp.psychiatryonline.org/residents\\_journal/rj\\_ifora](https://ajp.psychiatryonline.org/residents_journal/rj_ifora).

### 2020–2021 Editorial Board

#### Editor-in-Chief:

Matthew L. Edwards, M.D.

#### Senior Deputy Editor:

Austin Blum, J.D., M.D.

#### Deputy Editors:

Rachel Dillinger, M.D.

Fiona Fonseca, M.D.

Shirin Vartak, D.O.

#### Associate Editors:

Amanda Calhoun, M.D., M.P.H.

Christopher Magoon, M.D.

Danielle Lowe, M.D., Ph.D.

Jennifer Kim, J.D., M.D., M.S.

Shixie Jiang, M.D.

Matthew Yung, M.D.

Richard Hadi, M.D.

Colin Wendt, M.D.

#### Media Editors:

Priya Gearin, M.D.

Barrington Hwang, M.D.

Bharat Sampathi, M.D.

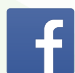

Find us on Facebook

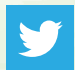

Follow @APAPubJournals

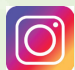

Find us on Instagram

AMERICAN  
PSYCHIATRIC  
ASSOCIATION  
PUBLISHING

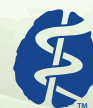

[www.appi.org](http://www.appi.org)
