# The American Journal of Psychiatry

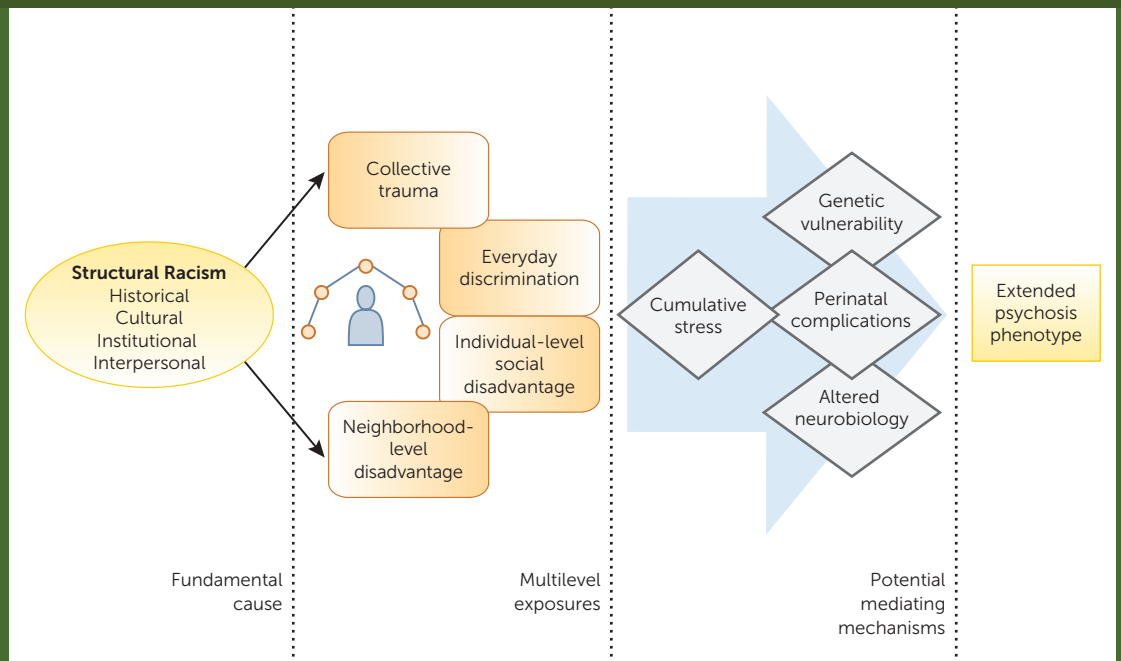

Impacts of Structural Racism, Socioeconomic Deprivation, and Stigmatization on Mental Health

Dismantling Structural Racism in Psychiatry:  
A Path to Mental Health Equity

From Womb to Neighborhood: A Racial Analysis of Social Determinants of Psychosis in the United States

Modification of Heritability for Educational Attainment and Fluid Intelligence by Socioeconomic Deprivation
